# Supplementary material for: The Raine study had no evidence of significant perinatal selection bias after two decades of follow up: a longitudinal pregnancy cohort study
Source: Springer Nature journal article supplement (doi:10.1186/s12884-017-1391-8), 2017-06-29
Supplement: MOESM1 [file 12493250]

**Supplemental Table 1.** Perinatal characteristics of the Raine Study Birth Cohort, the contemporaneous Western Australian population, and the evolving Raine Study.

|                                          | <i>Cohort</i>                            | <i>Western Australia<sup>a</sup></i> | <i>Raine Pregnancy Cohort<sup>b</sup></i> |                   |                               | <i>Raine Study 5 Year<sup>c</sup></i> |                   |                               | <i>Raine Study 20-year<sup>d</sup></i> |                   |                               | <i>Raine Study Growth<sup>e</sup></i> |                   |                               | <i>Raine Study NAFLD<sup>f</sup></i> |                  |  |
|------------------------------------------|------------------------------------------|--------------------------------------|-------------------------------------------|-------------------|-------------------------------|---------------------------------------|-------------------|-------------------------------|----------------------------------------|-------------------|-------------------------------|---------------------------------------|-------------------|-------------------------------|--------------------------------------|------------------|--|
|                                          | <i>Total n</i>                           | <i>99 141</i>                        | <i>2863</i>                               |                   | <i>2010</i>                   |                                       |                   | <i>1213</i>                   |                                        |                   | <i>1377</i>                   |                                       |                   | <i>879</i>                    |                                      |                  |  |
|                                          |                                          | <i>Mean (95% CI) or n (%)</i>        | <i>Mean (95% CI) or n (%)</i>             | <i>p (WA)</i>     | <i>Mean (95% CI) or n (%)</i> | <i>p (WA)</i>                         | <i>p (Raine)</i>  | <i>Mean (95% CI) or n (%)</i> | <i>p (WA)</i>                          | <i>p (Raine)</i>  | <i>Mean (95% CI) or n (%)</i> | <i>p (WA)</i>                         | <i>p (Raine)</i>  | <i>Mean (95% CI) or n (%)</i> | <i>p (WA)</i>                        | <i>p (Raine)</i> |  |
| Mother                                   | <b>Age (y)</b>                           | 27.7 (27.65, 27.71)                  | 27.5 (27.33, 27.76)                       | 0.229             | 28.4 (28.10, 28.61)           | <0.0001                               | <0.0001           | 28.8 (28.46, 29.10)           | <0.0001                                | <0.0001           | 28.2 (27.93, 28.54)           | <0.0001                               | <0.0001           | 28.8 (28.41, 29.19)           | <0.0001                              | <0.0001          |  |
|                                          | <b>Marital status:</b>                   |                                      |                                           |                   |                               |                                       |                   |                               |                                        |                   |                               |                                       |                   |                               |                                      |                  |  |
|                                          | Married                                  | 88 597 (89.4%)                       | 2 351 (82.1%)                             | <0.0001           | 1 716 (85.4%)                 | <0.0001                               | <0.0001           | 1 053 (86.8%)                 | <0.0001                                | <0.0001           | 1 177 (85.7%)                 | <0.0001                               | <0.0001           | 762 (86.7%)                   | 0.012                                | 0.002            |  |
|                                          | Not married                              | 10 544 (10.6%)                       | 512 (17.9%)                               |                   | 294 (14.6%)                   |                                       |                   | 160 (13.2%)                   |                                        |                   | 196 (14.3%)                   |                                       |                   | 117 (13.3%)                   |                                      |                  |  |
|                                          | <b>Ethnicity:</b>                        |                                      |                                           |                   |                               |                                       |                   |                               |                                        |                   |                               |                                       |                   |                               |                                      |                  |  |
|                                          | Caucasian                                | 86 607 (87.4%)                       | 2 566 (89.6%)                             | <0.0001           | 1 826 (90.8%)                 | <0.0001                               | 0.129             | 1 102 (90.8%)                 | <0.0001                                | 0.204             | 1 360 (99.1%)                 | <0.0001                               | <0.0001           | 872 (99.2%)                   | <0.0001                              | <0.0001          |  |
|                                          | Non-Caucasian                            | 12 534 (12.6%)                       | 297 (10.4%)                               |                   | 184 (9.2%)                    |                                       |                   | 111 (9.2%)                    |                                        |                   | 13 (0.9%)                     |                                       |                   | 7 (0.8%)                      |                                      |                  |  |
|                                          | <b>Parity:</b>                           |                                      |                                           |                   |                               |                                       |                   |                               |                                        |                   |                               |                                       |                   |                               |                                      |                  |  |
|                                          | 0                                        | 38 579 (39.0%)                       | 1 377 (48.1%)                             | <0.0001           | 939 (46.7%)                   | <0.0001                               | 0.738             | 572 (47.2%)                   | <0.0001                                | 0.719             | 653 (47.6%)                   | <0.0001                               | 0.991             | 425 (48.4%)                   | <0.0001                              | 0.972            |  |
|                                          | 1                                        | 32 393 (32.7%)                       | 821 (28.7%)                               |                   | 607 (30.2%)                   |                                       |                   | 368 (30.4%)                   |                                        |                   | 395 (28.8%)                   |                                       |                   | 248 (28.2%)                   |                                      |                  |  |
| 2                                        | 17 652 (17.8%)                           | 425 (14.8%)                          |                                           | 297 (14.8%)       |                               |                                       | 174 (14.4%)       |                               |                                        | 208 (15.2%)       |                               |                                       | 136 (15.5%)       |                               |                                      |                  |  |
| 3                                        | 6 660 (6.7%)                             | 167 (5.8%)                           |                                           | 119 (5.9%)        |                               |                                       | 70 (5.8%)         |                               |                                        | 82 (6.0%)         |                               |                                       | 52 (5.9%)         |                               |                                      |                  |  |
| 4                                        | 2 365 (2.4%)                             | 50 (1.7%)                            |                                           | 35 (1.7%)         |                               |                                       | 21 (1.7%)         |                               |                                        | 22 (1.6%)         |                               |                                       | 13 (1.5%)         |                               |                                      |                  |  |
| 5                                        | 788 (0.8%)                               | 14 (0.5%)                            |                                           | 7 (0.3%)          |                               |                                       | 6 (0.5%)          |                               |                                        | 6 (0.4%)          |                               |                                       | 3 (0.3%)          |                               |                                      |                  |  |
| ≥ 6                                      | 584 (0.6%)                               | 9 (0.3%)                             |                                           | 5 (0.2%)          |                               |                                       | 1 (0.1%)          |                               |                                        | 3 (0.2%)          |                               |                                       | 2 (0.2%)          |                               |                                      |                  |  |
| <b>Socioeconomic status:<sup>g</sup></b> |                                          |                                      |                                           |                   |                               |                                       |                   |                               |                                        |                   |                               |                                       |                   |                               |                                      |                  |  |
| IRSD                                     | 1022 (1022, 1022) <sup>h</sup>           | 1021 (1014, 1025)                    | 0.766                                     | 1035 (1025, 1037) | <0.001                        | 0.003                                 | 1046 (1033, 1047) | <0.001                        | <0.001                                 | 1035 (1027, 1042) | <0.001                        | 0.001                                 | 1047 (1034, 1049) | <0.001                        | <0.001                               |                  |  |
| Pregnancy                                | <b>Pregnancy complications</b>           | 29 771 (30.0%)                       | 1 106 (38.6%)                             | <0.0001           | 762 (37.9%)                   | <0.0001                               | 0.310             | 454 (37.4%)                   | <0.0001                                | 0.150             | 531 (38.7%)                   | <0.0001                               | 0.989             | 405 (46.1%)                   | <0.0001                              | 0.378            |  |
|                                          | <b>Mode of delivery:</b>                 |                                      |                                           |                   |                               |                                       |                   |                               |                                        |                   |                               |                                       |                   |                               |                                      |                  |  |
|                                          | Spontaneous vertex                       | 63 077 (63.6%)                       | 1 750 (61.1%)                             | <0.0001           | 1 218 (60.6%)                 | <0.0001                               | 0.477             | 723 (59.6%)                   | <0.0001                                | 0.062             | 857 (62.4%)                   | 0.073                                 | 0.090             | 465 (60.1%)                   | 0.242                                | 0.806            |  |
|                                          | Breech                                   | 1083 (1.1%)                          | 33 (1.2%)                                 | 0.828             | 17 (0.8%)                     | 0.338                                 | 0.361             | 11 (0.9%)                     | 0.627                                  | 0.592             | 10 (0.7%)                     | 0.241                                 | 0.255             | 7 (0.8%)                      | 0.498                                | 0.477            |  |
|                                          | Instrumental                             | 17 320 (17.5%)                       | 508 (17.7%)                               | 0.655             | 355 (17.7%)                   | 0.804                                 | 0.958             | 230 (19.0%)                   | 0.097                                  | 0.266             | 239 (17.4%)                   | 0.969                                 | 0.772             | 158 (18.0%)                   | 0.728                                | 0.915            |  |
| Caesarean section                        | 18 744 (18.9%)                           | 605 (21.1%)                          | <0.0001                                   | 437 (21.7%)       | <0.0001                       | 0.523                                 | 260 (21.4%)       | 0.005                         | 0.809                                  | 277 (20.2%)       | 0.137                         | 0.370                                 | 248 (20.4%)       | 0.291                         | 0.659                                |                  |  |
| Child                                    | <b>Weight (g)</b>                        | 3 344 (3340, 3348)                   | 3 283 (3260, 3306)                        | <0.0001           | 3 315 (3289, 3341)            | 0.034                                 | 0.077             | 3 316 (3284, 3348)            | 0.088                                  | 0.109             | 3 389 (3359, 3418)            | 0.003                                 | <0.0001           | 3 384 (3348, 3420)            | 0.031                                | <0.0001          |  |
|                                          | <b>Length (cm)</b>                       | 49.9 (49.9, 50.0)                    | 48.8 (48.7, 49.0)                         | <0.0001           | 49.0 (48.9, 49.1)             | <0.0001                               | 0.122             | 49.0 (48.9, 49.2)             | <0.0001                                | 0.046             | 49.3 (49.2, 49.4)             | <0.0001                               | <0.0001           | 49.3 (49.1, 49.5)             | <0.0001                              | <0.0001          |  |
|                                          | <b>Ponderal index (kg/m<sup>3</sup>)</b> | 26.7 (26.7, 26.7)                    | 27.9 (27.7, 28.0)                         | <0.0001           | 28.0 (27.8, 28.1)             | <0.0001                               | 0.224             | 27.9 (27.8, 28.1)             | <0.0001                                | 0.507             | 28.1 (28.0, 28.3)             | <0.0001                               | 0.015             | 28.1 (27.9, 28.3)             | <0.0001                              | 0.025            |  |
|                                          | <b>Head circumference (cm)</b>           | 34.4 (34.4, 34.4)                    | 34.5 (34.4, 34.5)                         | 0.120             | 34.6 (34.5, 34.7)             | <0.0001                               | 0.060             | 34.6 (34.5, 34.7)             | <0.0001                                | 0.024             | 34.7 (34.7, 34.8)             | <0.0001                               | <0.0001           | 34.8 (34.7, 34.9)             | <0.0001                              | <0.0001          |  |
|                                          | <b>Gestation (weeks)</b>                 | 39.1 (39.1, 39.1)                    | 39.0 (38.9, 39.1)                         | 0.045             | 39.1 (39.0, 39.2)             | 0.857                                 | 0.129             | 39.2 (39.1, 39.3)             | 0.098                                  | 0.010             | 39.3 (39.2, 39.4)             | <0.0001                               | <0.0001           | 39.3 (39.2, 39.4)             | 0.0004                               | <0.0001          |  |
|                                          | <b>Nursery admission</b>                 | 7 545 (7.6%)                         | 277 (9.7%)                                | <0.0001           | 184 (9.2%)                    | 0.005                                 | 0.529             | 103 (8.5%)                    | 0.230                                  | 0.209             | 97 (7.1%)                     | 0.442                                 | 0.003             | 65 (7.4%)                     | 0.860                                | 0.047            |  |

<sup>a</sup> Western Australia: all individuals born in Western Australia contemporaneously to the Raine Study (1 January 1989 to 31 December 1992), excluding the Raine Study participants

<sup>b</sup> Raine Pregnancy Cohort: all liveborn offspring participants of the Western Australian Pregnancy Cohort (Raine) Study

<sup>c</sup> Raine 5-year Subset: Raine Study participants who took part in the 5 year follow up assessment

<sup>d</sup> Raine 20-year Subset: Raine Study participants who took part in the 20-year follow up assessment

<sup>e</sup> Raine Growth Subset: Raine Study participants with at least one Caucasian parent, who were liveborn, singletons, unrelated, without significant congenital anomalies, and who consented to genetic association studies

<sup>f</sup> Raine Non-alcoholic Fatty Liver Disease Subset: Those members of the Raine Study Growth Subset who underwent abdominal ultrasound assessment of non-alcoholic fatty liver disease features at age 17 years

<sup>g</sup> Socioeconomic status described by Socioeconomic Indexes For Areas (SEIFA, Australian Bureau of Statistics): IRSD = Index of Relative Socioeconomic Disadvantage. Greater values represent greater socioeconomic advantage. Confidence intervals derived by bootstrapping method with mean trimmed by 0.2 and 2000 repetitions.

<sup>h</sup> IRSD data were not available for the Western Australian subset of mainly young metropolitan mothers, instead data for the entire Western Australian metropolitan area at the 1991 census is provided.

p (Raine) and p (WA) represent p-values for comparisons against the Raine Study Birth Cohort and the Western Australian population.

na = not available/applicable
